# Supplementary material for: Identification and Functional Analysis of a Novel Hydrophobic Protein VdHP1 from Verticillium dahliae
Source: PubMed Central journal article supplement (PMC9045179; doi:10.1128/spectrum.02478-21), 2022-04-04
Supplement: spectrum02478-21_supp_1_seq3.pdf [file spectrum02478-21_supp_1_seq3.pdf]

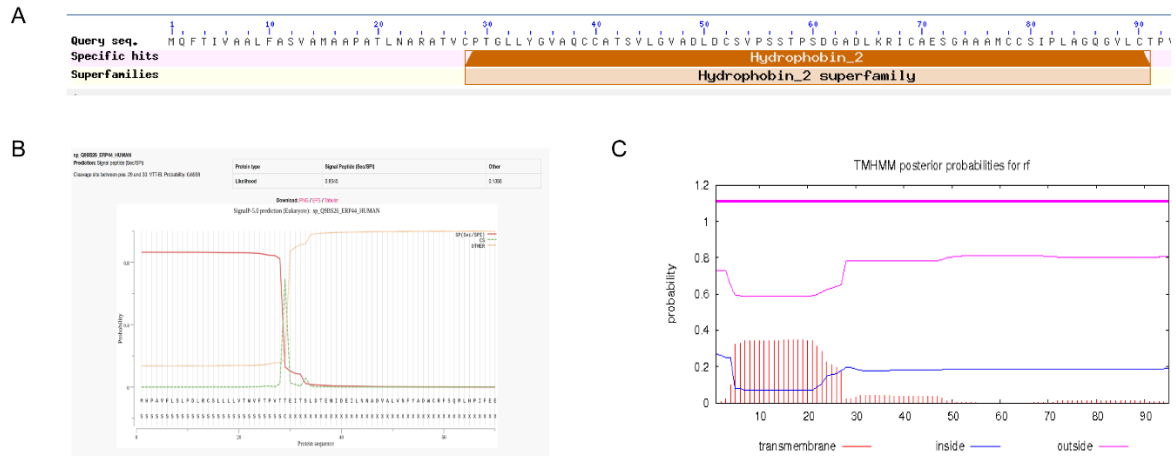

**FIG S1: Bioinformatics analysis of VdHP1. (A) The conserved domain of VdHP1. (B) Transmembrane domain analysis of VdHP1. (C) The signal peptide sites of VdHP1 protein.**

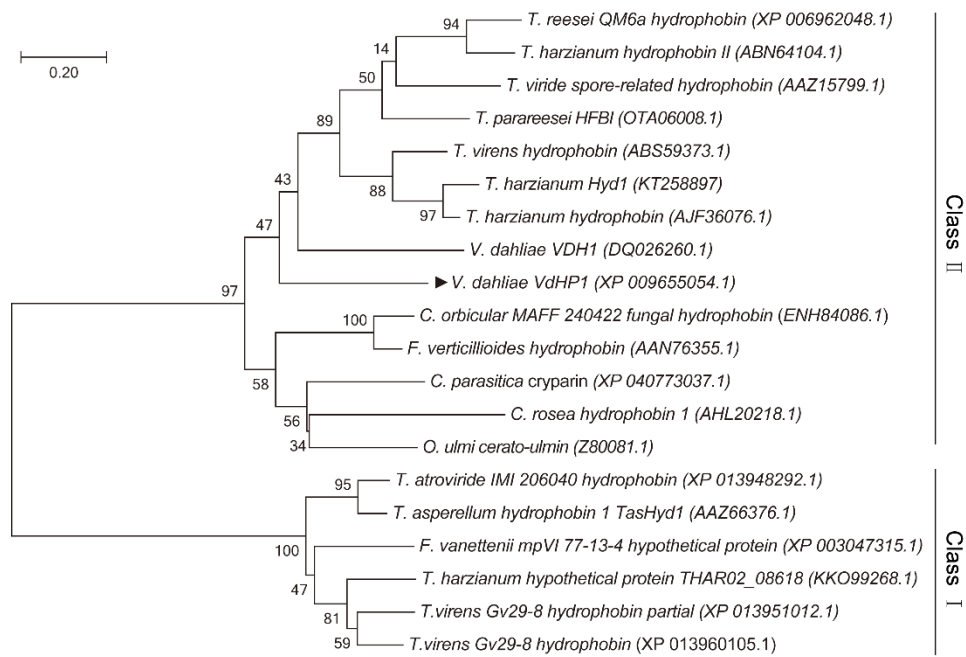

**FIG S2:** Phylogenetic analysis. MEGA 7 software used to construct phylogenetic neighbor-joining tree of the VdHP1 protein sequences and some hydrophobins sequences. The VdHP1 protein was marked with a black triangle and the hydrophobins sequences are from the GenBank database.

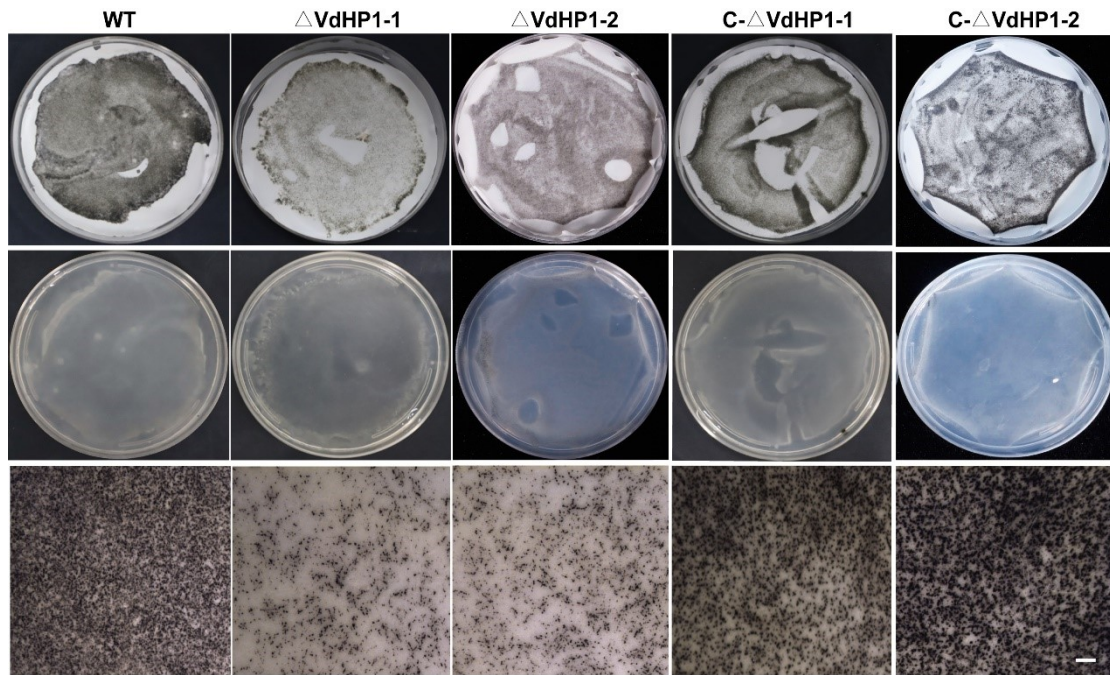

**FIG S3:** Deletion of VdHP1 inhibited microscerotial formation. The conidia were spread over the cellulose membrane ( $\varphi = 0.45 \mu\text{m}$ ) after 6 dpi of growth. The image of the microscerotia was taken under a stereomicroscope. Bar = 5 mm

**Supplementary Table 1: Primers used in this study.**

| Primer name        | Sequence (5'-3')                                    | Enzyme loci | In this study            |
|--------------------|-----------------------------------------------------|-------------|--------------------------|
| VdHP1-F            | ATGCAGTTCACCATCGTCG                                 |             | PCR,qPCR,sqRT-PCR        |
| VdHP1-R            | TTAACCAACGACGGGAGTGC                                |             | PCR,qPCR,sqRT-PCR        |
| Hyg-F              | GACGTAACTGATATTGAAG                                 |             | PCR,qPCR                 |
| Hyg-R              | CGTCCGAGGGCAAAGGAATAG                               |             | PCR,qPCR                 |
| B303-VdHP1-UP-F    | GGACCGGACGGGGCGGTACCG<br>CGCTGACGACATGCCTT          | KpnI        | deletion of <i>VdHP1</i> |
| B303-VdHP1-UP-R    | TTTGAAGGTGGTTTGGTTTGGT<br>TGGTGGTGGTGGTAGAGGTTG     |             | deletion of <i>VdHP1</i> |
| B303-VdHP1-Hyg-F   | CAAACCAAACCACCTTCAAAG<br>ACGTAACTGATATTGAAG         |             | deletion of VdHP1        |
| B303-VdHP1-Hyg-R   | ACACGATTGAGTCAGAACTTC<br>GTCCGAGGGCAAAGGAATAG       |             | deletion of VdHP1        |
| B303-VdHP1-DOWN-F  | CTATTCCTTTGCCCTCGGACAA<br>G<br>TTCTGACTCAATCGTGTGAT |             | deletion of VdHP1        |
| B303-VdHP1-DOWN-R  | TTAATTAAGACCCGGGACTAAA<br>GCACATCTCTCCAGCAGC        | PacI        | deletion of VdHP1        |
| 1302 - VdHP1-UP-F  | GACAGCCCGCAAACCTCTAGA<br>GCGCTGACGACATGCCTT         | XbaI        | complementation of VdHP1 |
| 1302 - VdHP1-UP-R  | GCGACGATGGTGAACCTGCATTT<br>TGAAGGTGGTTTGGTTTGG      |             | complementation of VdHP1 |
| 1302-VdHP1-F       | CCAAACCAAACCACCTTCAA<br>A<br>TGCAGTTCACCATCGTCGC    |             | complementation of VdHP1 |
| 1302-VdHP1-R       | ACACGATTGAGTCAGAACTTTT<br>A<br>ACCAACGACGGGAGTGC    |             | complementation of VdHP1 |
| 1302-VdHP1-DOWN -F | AAGTTCTGACTCAATCGTGT<br>GAT<br>TTGTATGCGGCGCAATTCT  |             | complementation of VdHP1 |
| 1302-VdHP1-DOWN -R | ATTATTATGGAGAACTCGAG<br>AAGCACATCTCTCCAGCAGC        | XhoI        | complementation of VdHP1 |

|                  |                                  |       |                                   |
|------------------|----------------------------------|-------|-----------------------------------|
| Vdβt-F           | AACAACAGTCCGATGGATAATT<br>C      |       | qRT-PCR                           |
| Vdβt-R           | GTACCGGGCTCGAGATCG               |       | qRT-PCR                           |
| Act-F            | CCTATGTTGCCCTGGACTATGA<br>GC     |       | qRT-PCR                           |
| Act-R            | GGACAACGGAATCTCTCAGCTC<br>C      |       | qRT-PCR                           |
| Hyg probe-F      | atttgtagcggcagcagc               |       | for Southern blotting             |
| Hyg probe-R      | gtgctgacattggggaatt              |       | for Southern blotting             |
| pSUC2-VdHP1-F    | CGGAATTCATGCAGTTCACCAT<br>CGTCGC | EcoR1 | Yeast signal sequence trap system |
| pSUC2-VdHP1-R    | CCGCTCGAGGGGCAGACGGTG<br>GCA     | Xho1  | Yeast signal sequence trap system |
| <i>NbActin-F</i> | TGGTCGTACCACCGGTATTGTG<br>TT     |       | sqRT                              |
| <i>NbActin-R</i> | TCACTTGCCCATCAGGAAGCTC<br>AT     |       | sqRT                              |
